# Supplementary material for: Interaction of Mycotoxin Alternariol with Serum Albumin
Source: MDPI journal article supplement (doi:10.3390/ijms20092352), 2019-05-12
Supplement: s1 [file s1]

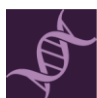

### Supplementary Materials

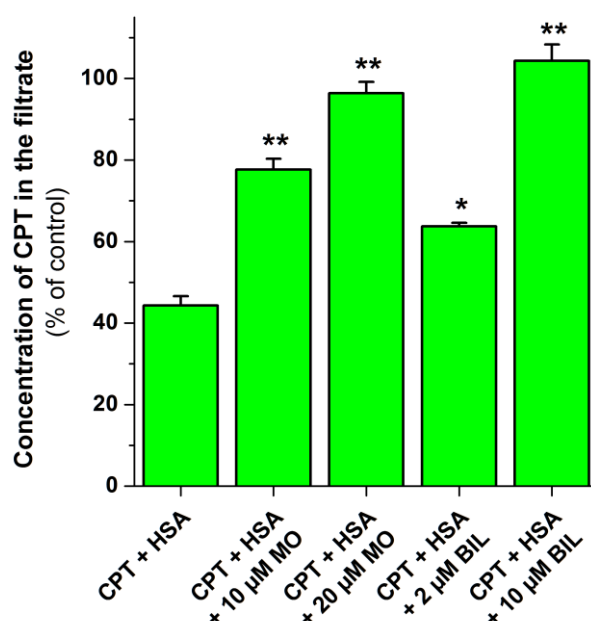

**Figure S1.** Displacement of S-camptothecin (CPT) from HSA by methyl orange (MO) and bilirubin (BIL). Concentration of CPT in the filtrate (% of control): Before the ultrafiltration, samples contained CPT and HSA (1.0 and 1.5  $\mu\text{M}$ , respectively) with or without MO (10 and 20  $\mu\text{M}$ ) or BIL (2 and 10  $\mu\text{M}$ ) in PBS (pH 7.4; \*  $p < 0.05$ , \*\*  $p < 0.01$ ). The filtered concentration of CPT was compared to the concentration measured in the filtrate when no HSA was added to the sample (100%).
